# Supplementary material for: DNA methylation and lipid metabolism: an EWAS of 226 metabolic measures
Source: PubMed Central journal article supplement (PMC7789600; doi:10.1186/s13148-020-00957-8), 2021-01-07

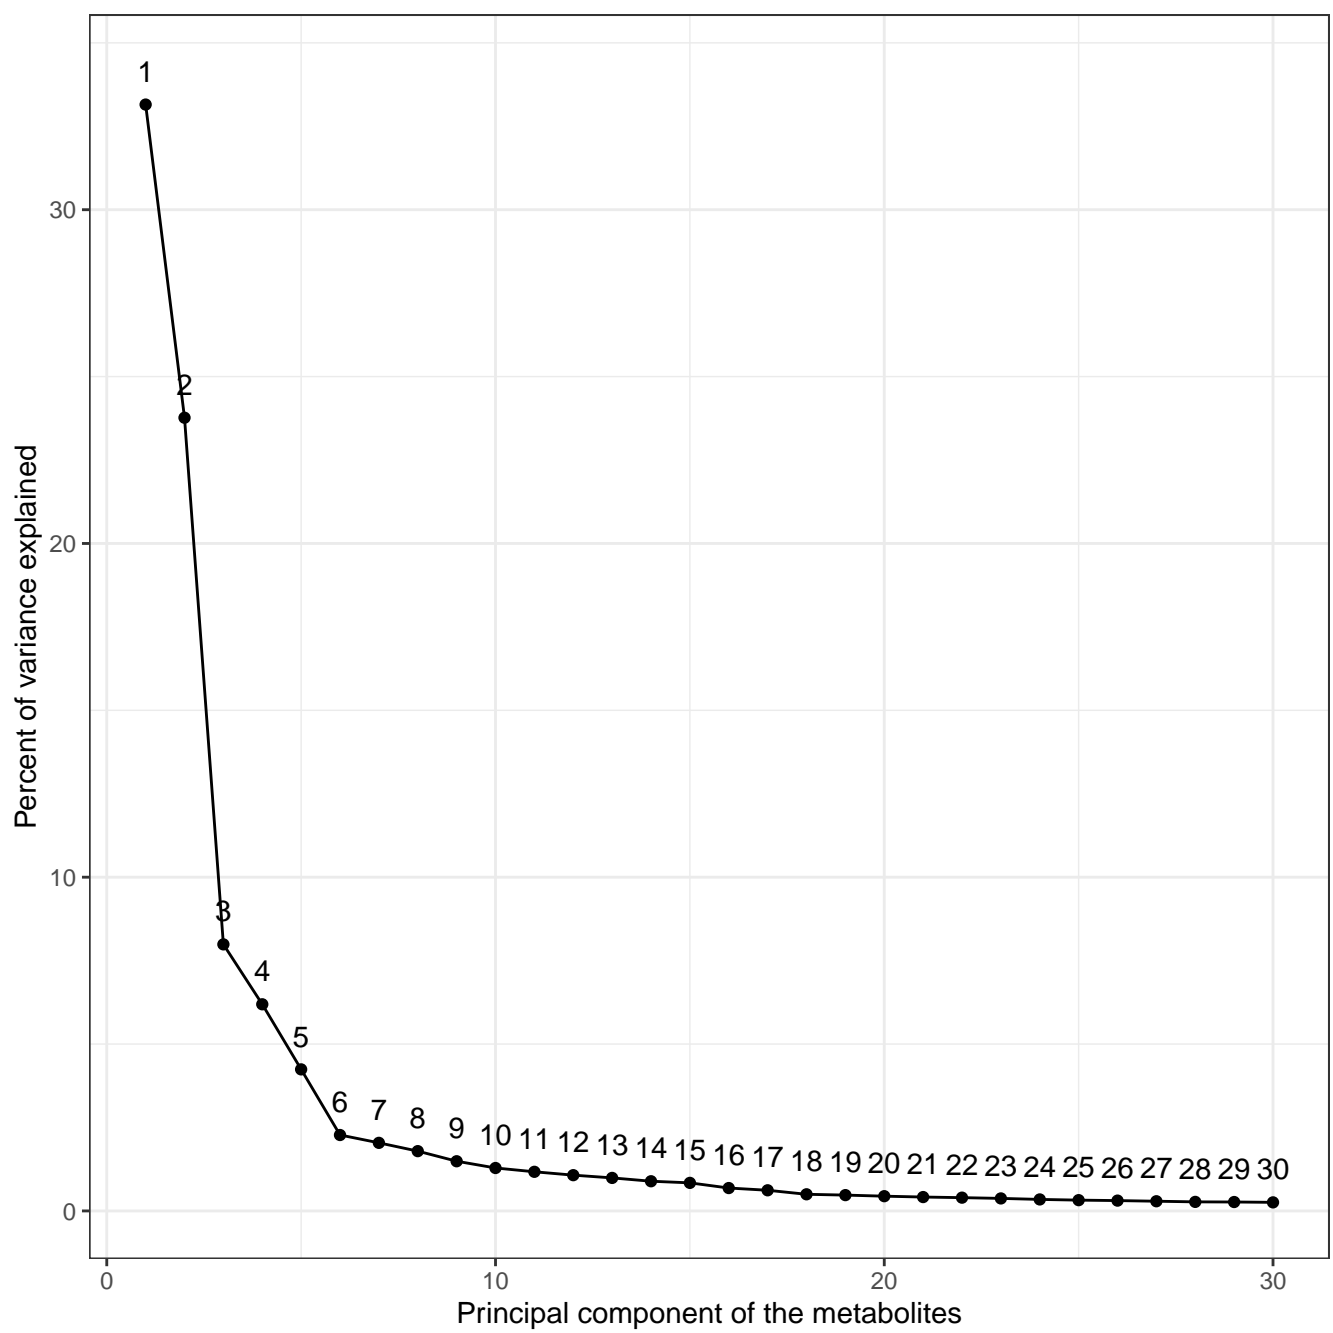

Supplement: 13148_2020_957_MOESM7_ESM.pdf [file 13148_2020_957_MOESM7_ESM.pdf]
