# Supplementary material for: DNA methylation and lipid metabolism: an EWAS of 226 metabolic measures
Source: PubMed Central journal article supplement (PMC7789600; doi:10.1186/s13148-020-00957-8), 2021-01-07
Supplement: 13148_2020_957_MOESM8_ESM.pdf [file 13148_2020_957_MOESM8_ESM.pdf]

# Metabolites PCA: Sex

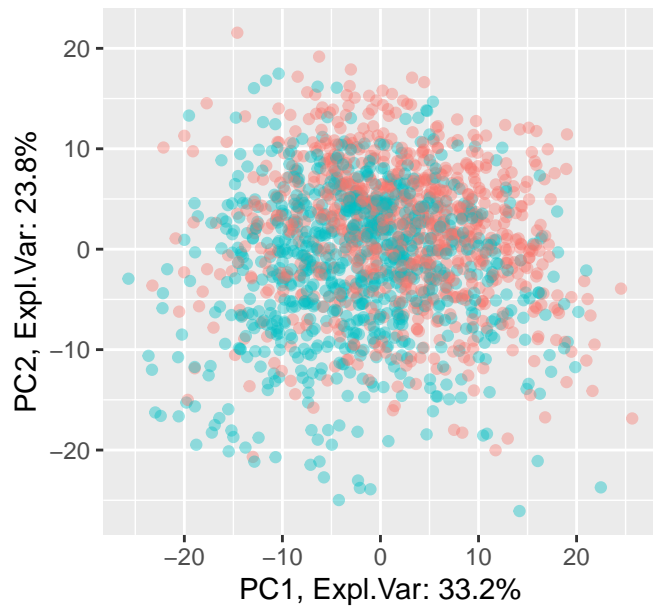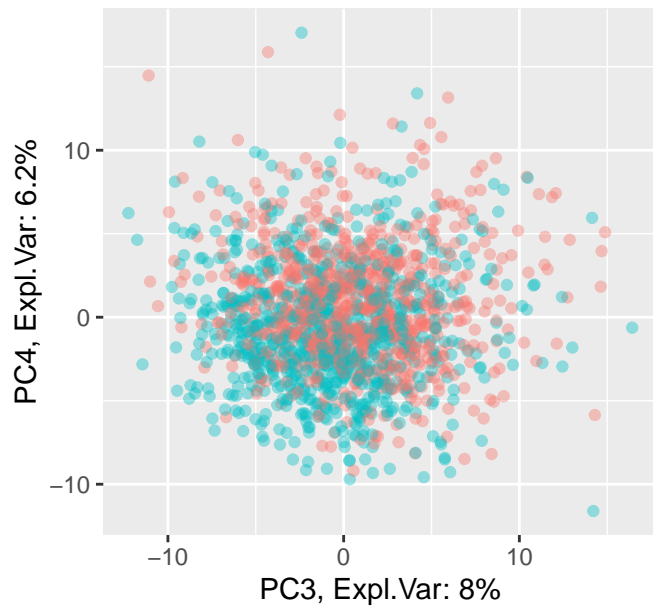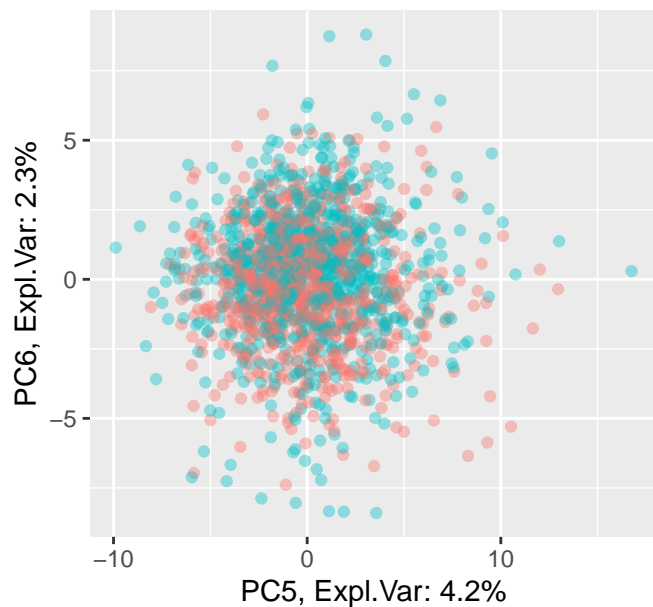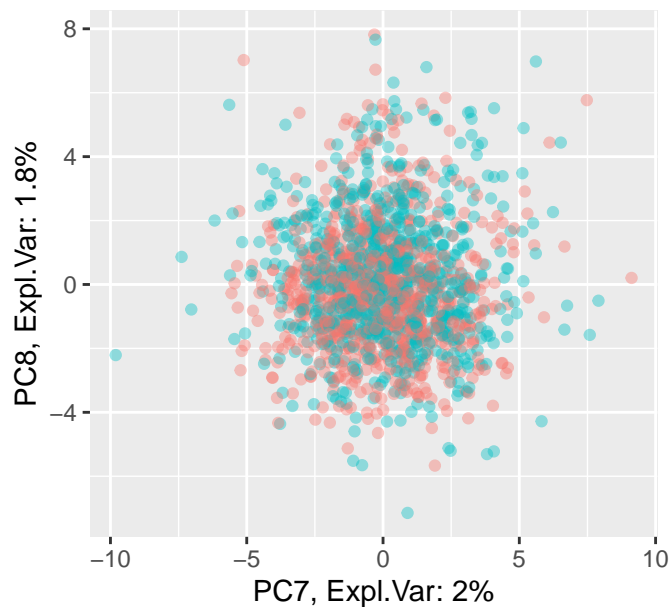

Sex ● female ● male

# Metabolites PCA: Lipid-lowering–drug Intake

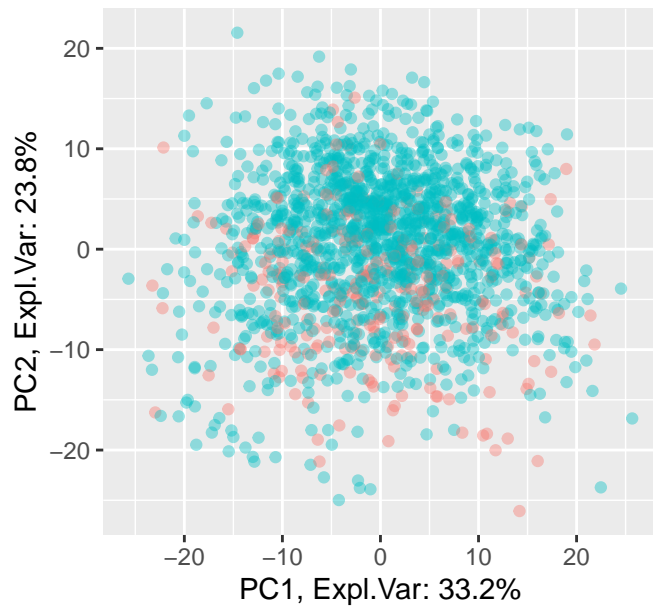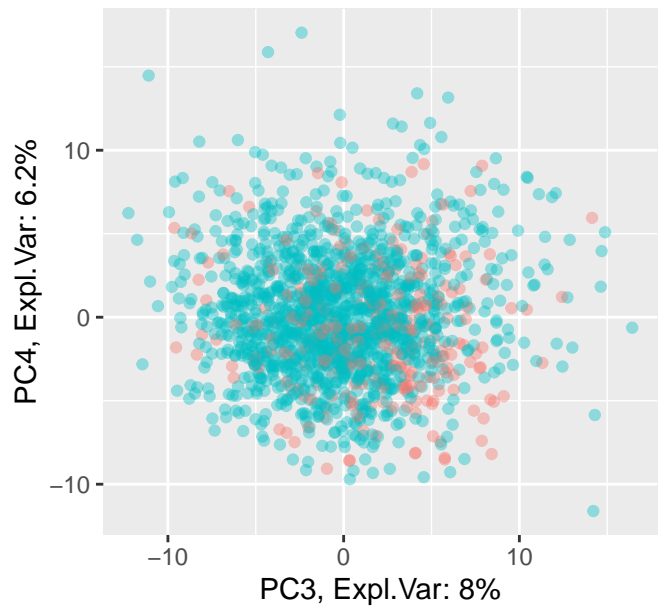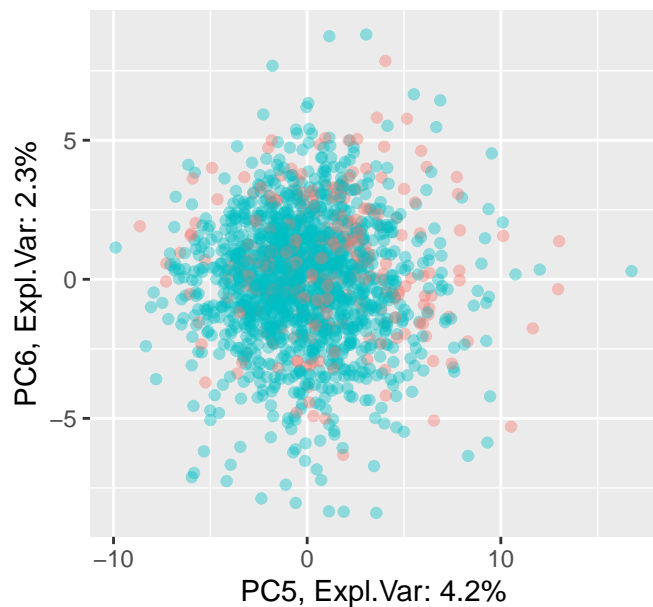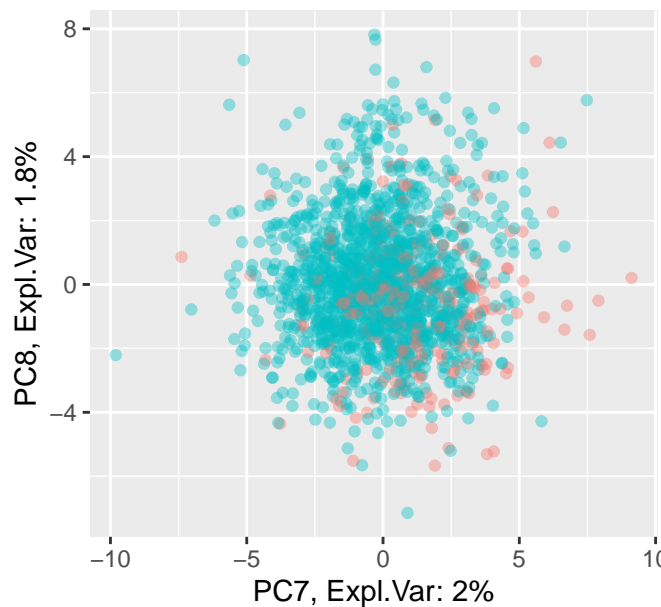

LLD ● no ● yes

# Metabolites PCA: Smoking

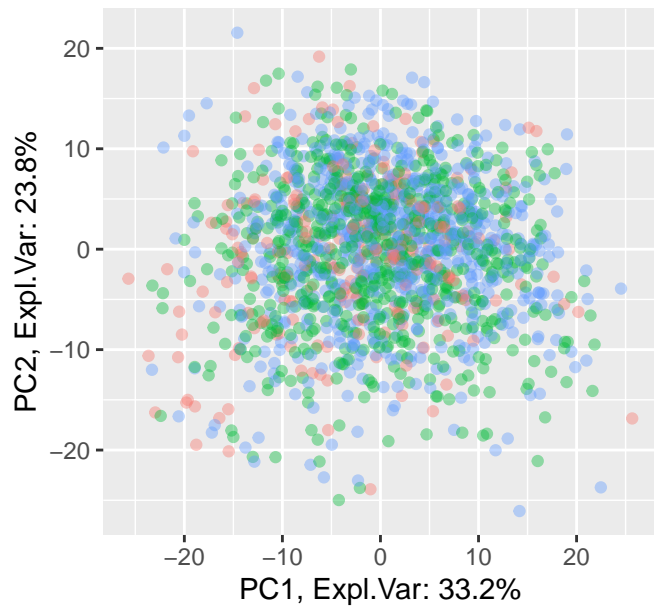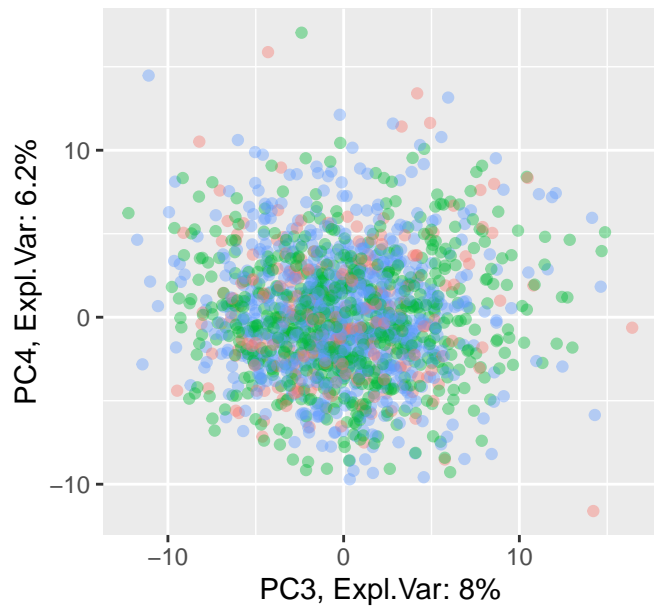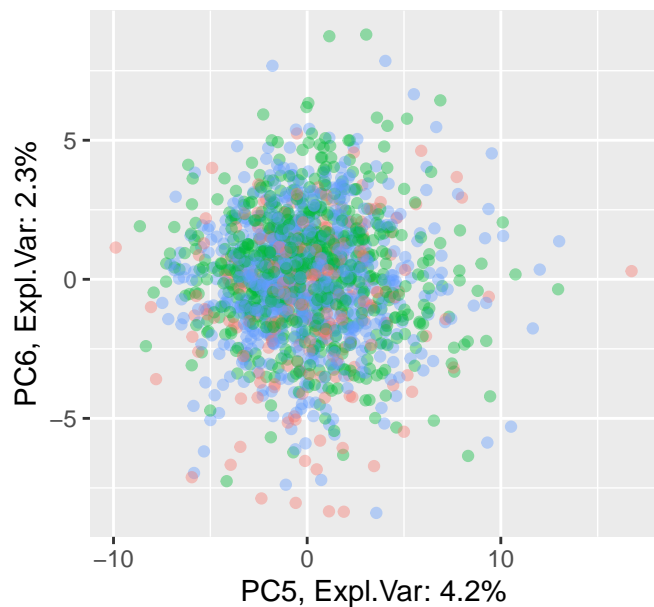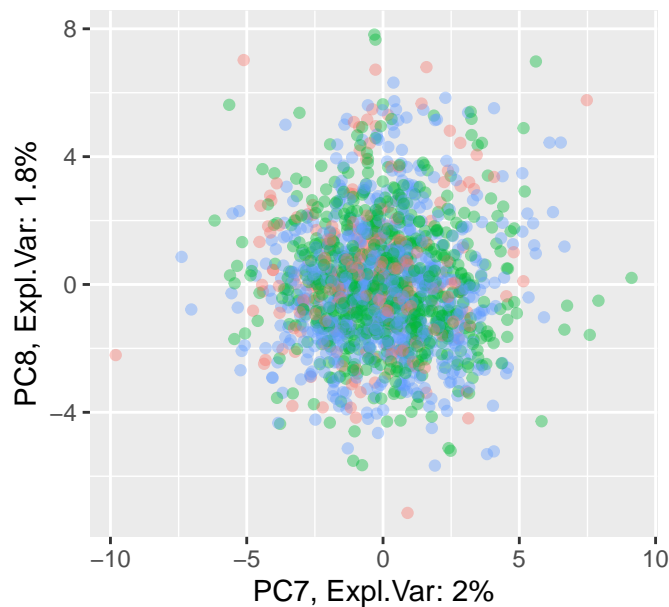

Smoking ● Current ● Ex ● Nev
