# Supplementary material for: DNA methylation and lipid metabolism: an EWAS of 226 metabolic measures
Source: PubMed Central journal article supplement (PMC7789600; doi:10.1186/s13148-020-00957-8), 2021-01-07
Supplement: 13148_2020_957_MOESM18_ESM.pdf [file 13148_2020_957_MOESM18_ESM.pdf]

# Supplemental figure 4: ROC comparison

## diabetes: M1-cg19693031

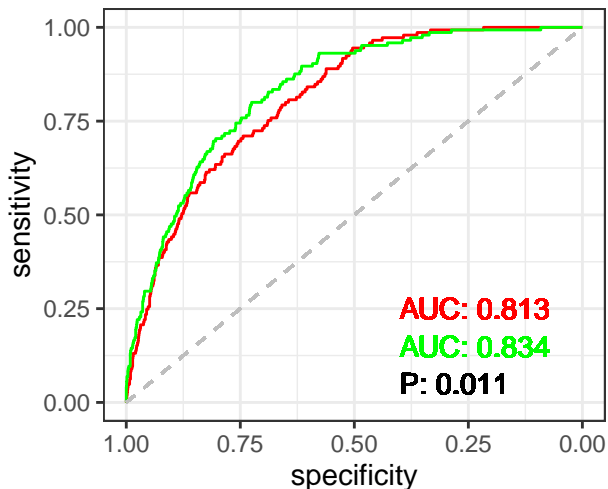

Model — M1 without CpG — M1 with CpG

## diabetes: M2-cg19693031

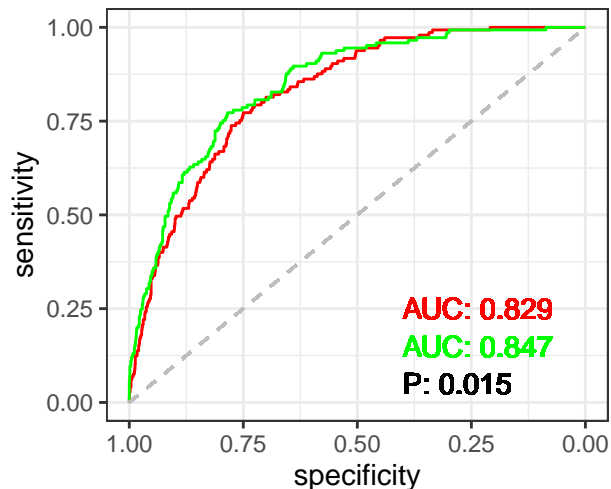

Model — M2 without CpG — M2 with CpG

## MI: M1-cg06500161

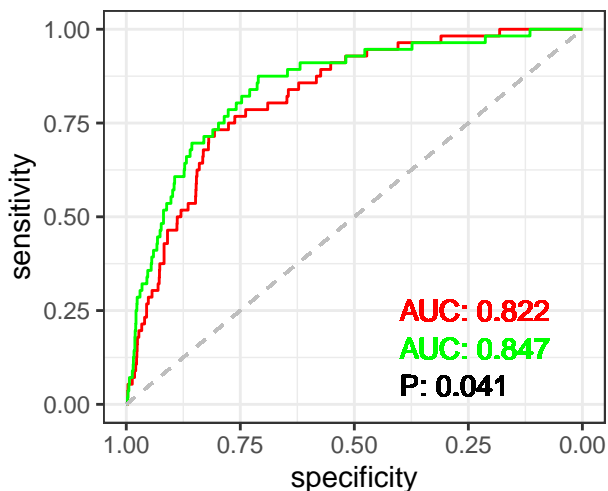

Model — M1 without CpG — M1 with CpG

## MI: M2-cg06500161

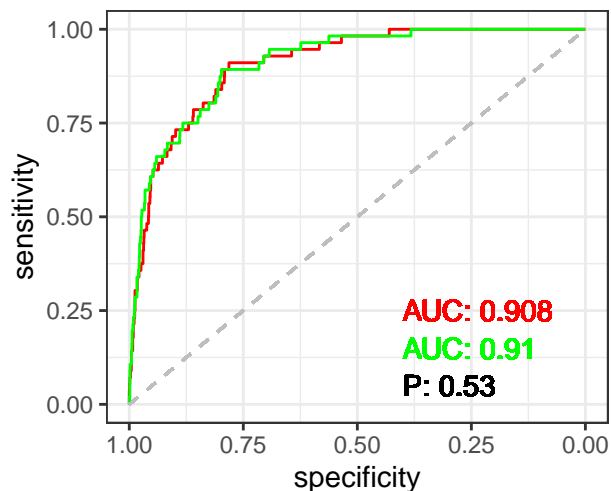

Model — M2 without CpG — M2 with CpG

# Supplemental figure 4: ROC comparison

## MI: M1-cg17901584

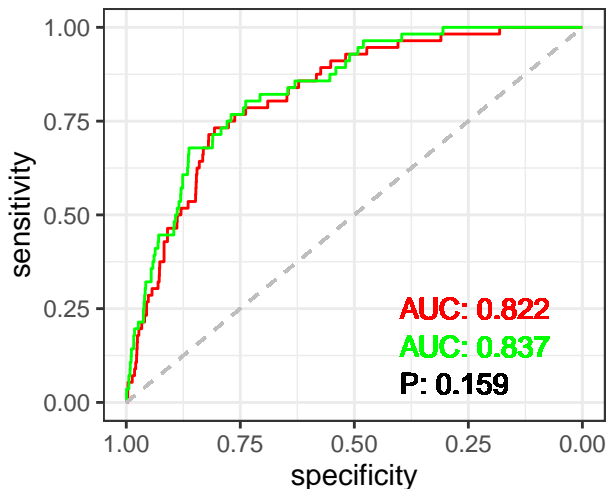

Model — M1 without CpG — M1 with CpG

## MI: M2-cg17901584

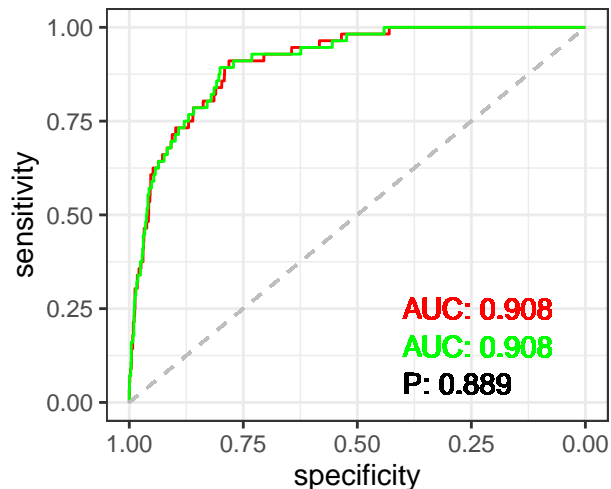

Model — M2 without CpG — M2 with CpG

## obesity: M1-cg06500161

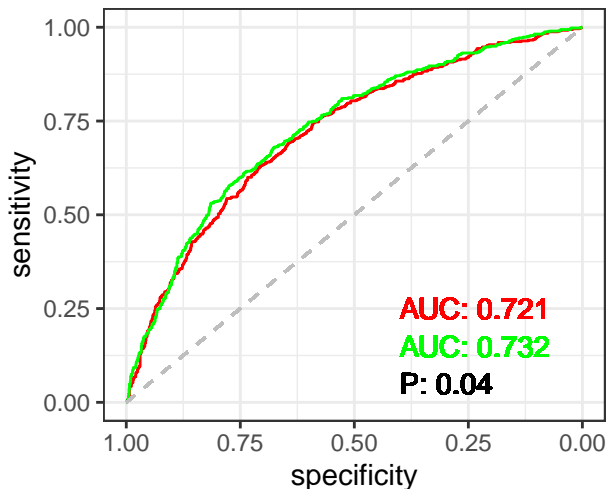

Model — M1 without CpG — M1 with CpG

## obesity: M2-cg06500161

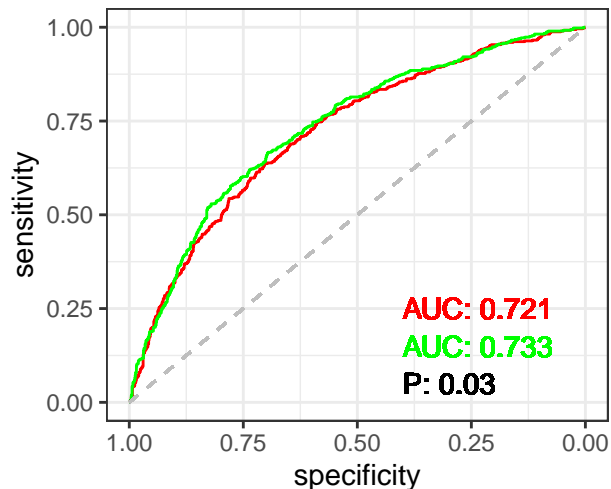

Model — M2 without CpG — M2 with CpG

# Supplemental figure 4: ROC comparison

## obesity: M1-cg27243685

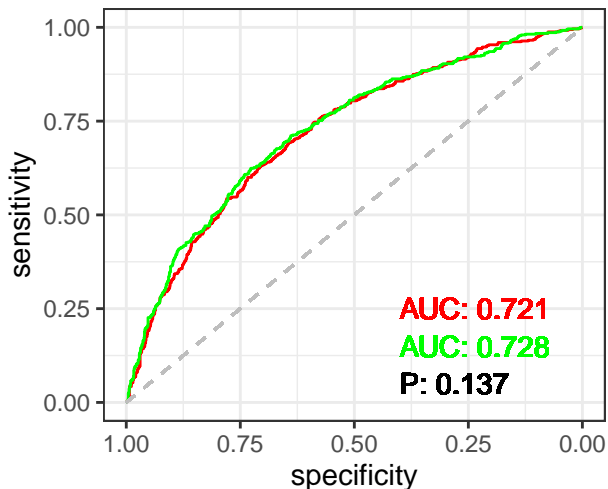

## obesity: M2-cg27243685

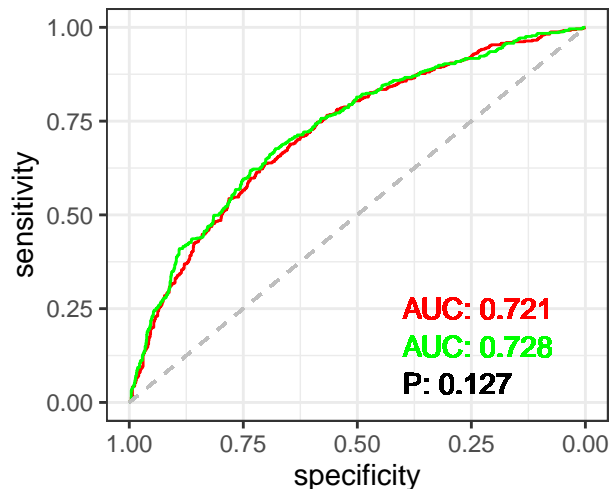

## obesity: M1-cg00574958

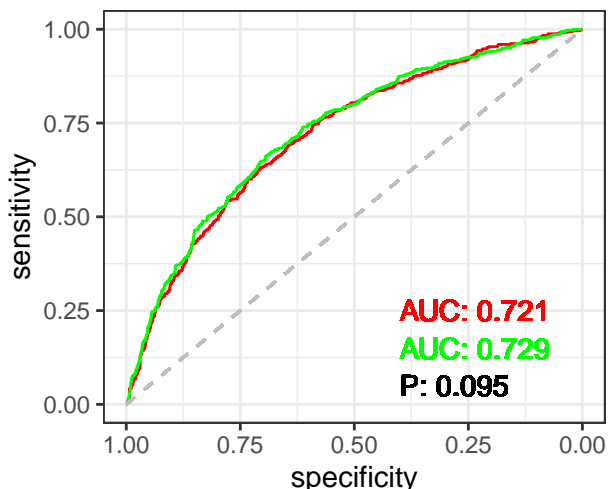

## obesity: M2-cg00574958

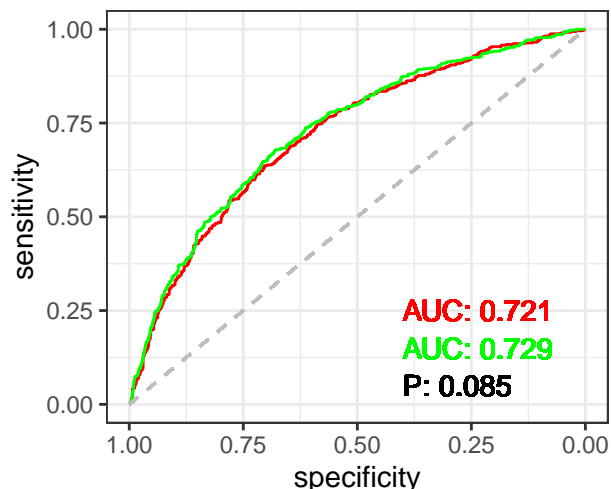

# Supplemental figure 4: ROC comparison

## obesity: M1-cg07504977

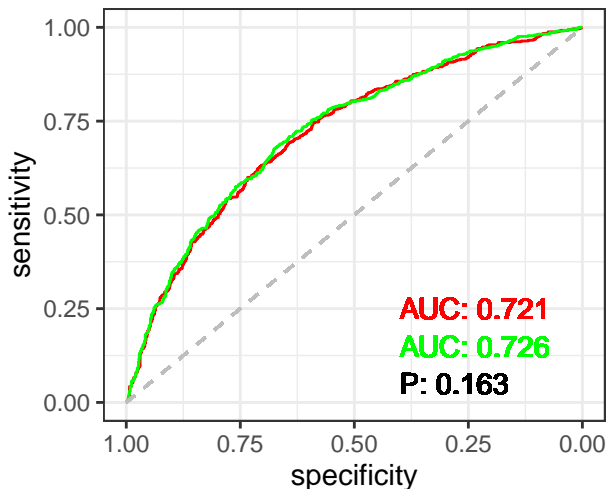

Model — M1 without CpG — M1 with CpG

## obesity: M2-cg07504977

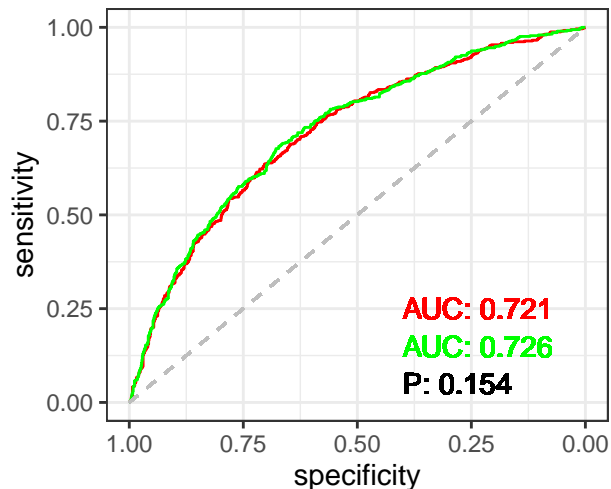

Model — M2 without CpG — M2 with CpG

## obesity: M1-cg16246545

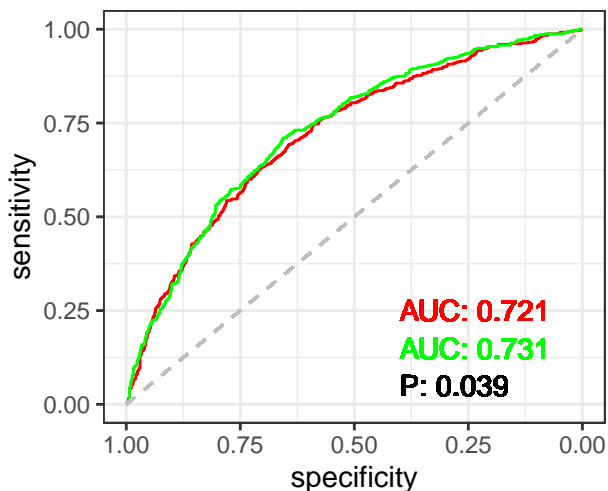

Model — M1 without CpG — M1 with CpG

## obesity: M2-cg16246545

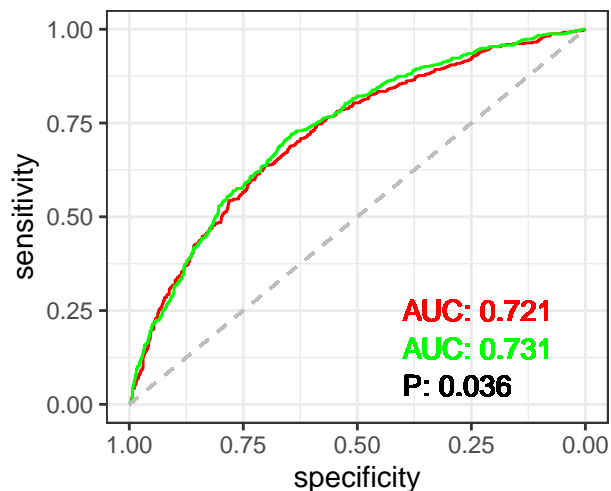

Model — M2 without CpG — M2 with CpG

# Supplemental figure 4: ROC comparison

## obesity: M1-cg06690548

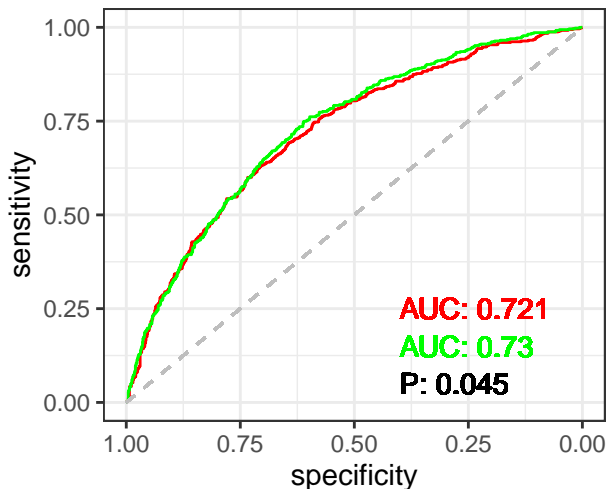

Model — M1 without CpG — M1 with CpG

## obesity: M2-cg06690548

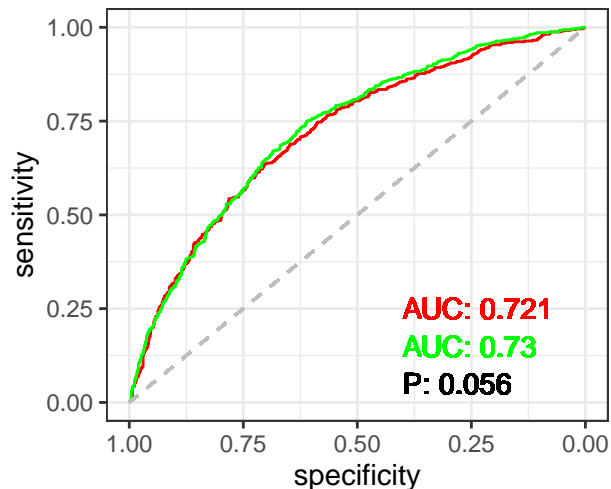

Model — M2 without CpG — M2 with CpG

## obesity: M1-cg11024682

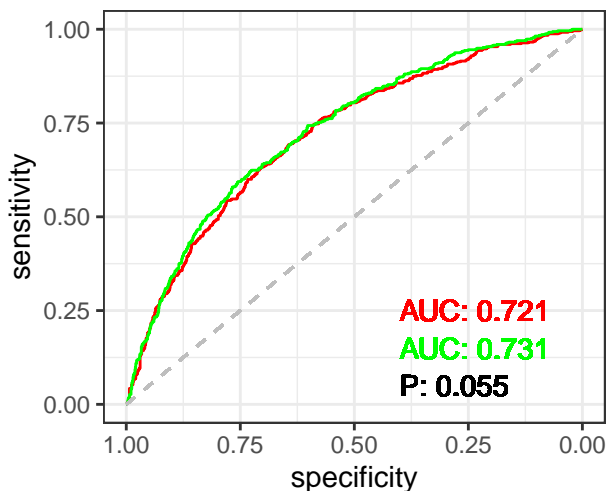

Model — M1 without CpG — M1 with CpG

## obesity: M2-cg11024682

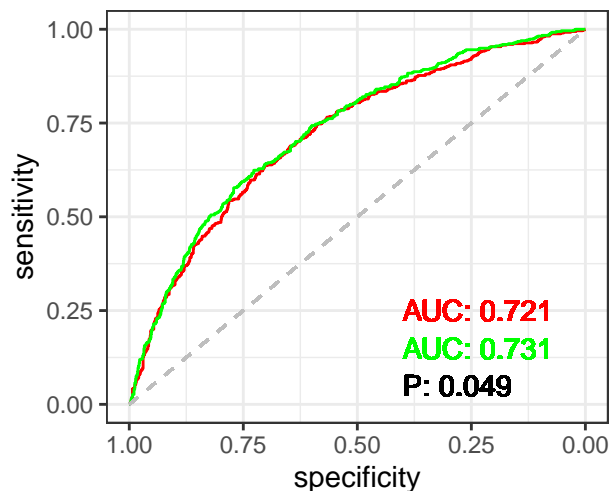

Model — M2 without CpG — M2 with CpG
