# Supplementary material for: DNA methylation and lipid metabolism: an EWAS of 226 metabolic measures
Source: Clin Epigenetics. 2021 Jan 7;13:7. doi: 10.1186/s13148-020-00957-8 (PMC7789600; doi:10.1186/s13148-020-00957-8)
Supplement: Supplementary file 5 — Additional file 5: Table S4. Replication tables. Replicated associations are displayed by CpG site, CpG gene location, metabolite (metabolic measure), and metabolite type (metabolic measure type). A total of 274 significant, robust associations in the discovery cohort (KORA F4) were found. [file 13148_2020_957_MOESM5_ESM.xlsx]

## Sheet: CpGs
Category

## Sheet: Genes
Category

## Sheet: Metabolites
Category

## Sheet: Metabolite_type
Category
